# Supplementary material for: Estimates of genetic parameters for chemical traits of meat quality in Japanese black cattle
Source: PubMed Central journal article supplement (PMC5298003; doi:10.1111/asj.12622), 2016-05-05
Supplement: ASJ-88-203-s001.pdf [file ASJ-88-203-s001.pdf]

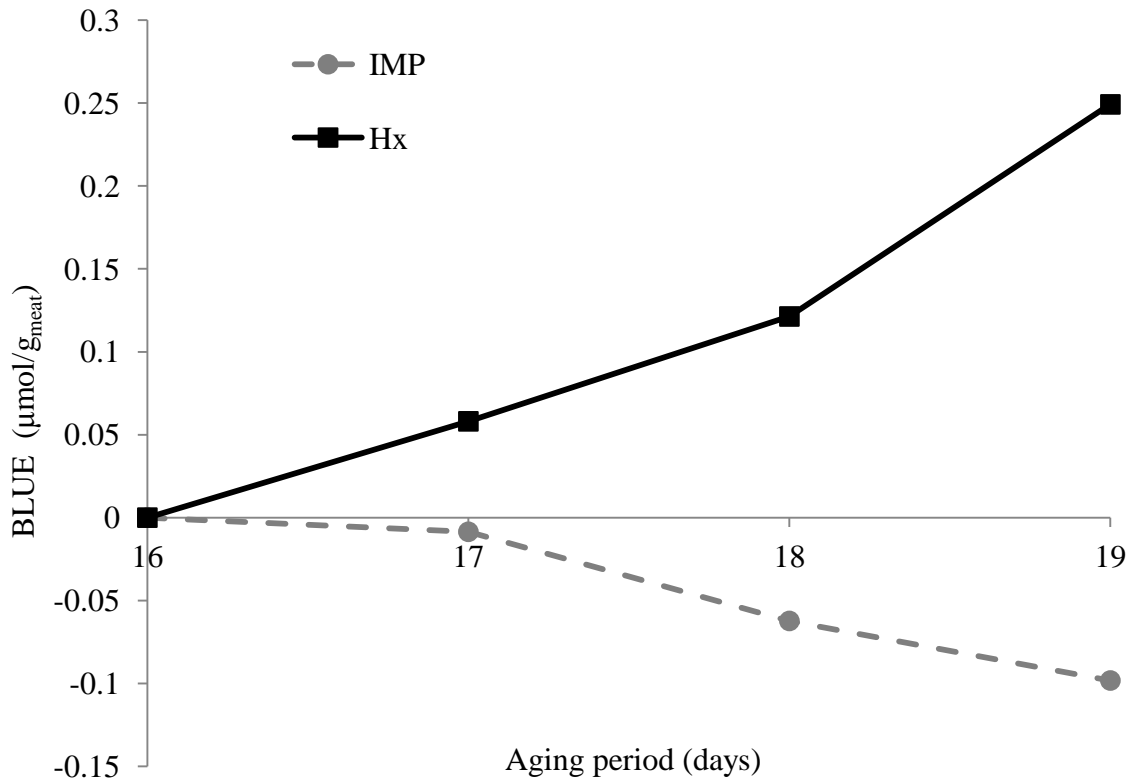

**Figure S1.** Changes in the best linear unbiased estimator (BLUE) of inosine 5'-monophosphate (IMP) and hypoxanthine (Hx) in meat during the aging period from 16 to 19 days.
